# Supplementary material for: A novel statistical approach to predict seasonal high tide flooding
Source: Frontiers journal article supplement (doi:10.3389/fmars.2022.1073792), 2022-12-08
Supplement: Table_2.xlsx [file Table_2.xlsx]

## Sheet: Sheet1
	Table S2. The per tide gauge statistics shown in the manuscript are provided here. From left to right: (B) The station name; (C) Latitude; (D) Longitude; (E) Minor Flood Threshold in meters relative to MHHW; (F) Total Floods where the minor flood threshold was exceeded between 1997-2019; (G) the fraction of the daily maximum observed water level explained by predicted tides; For the climatologica…
Station Number	Station Name	Lat	Lon	Flood Threshold MHHW (m)	Total Floods	Daily Max Explained by Tides	BSS	recall at 5%	FAR at 5%	BSS 1 mo.	Recall 1 mo. at 5%	FAR 1 mo. at 5%	BSS 3 mo.	Recall 3 mo. at 5%	FAR 3 mo. at 5%	mu corr. 1 mo.	mu corr. 3 mo.	2020 MSL (m)	2040 MSL (m)	2000 BSS	2020 BSS	2040 BSS
1611400	Nawiliwili, HI	21.9544	-159.356	0.30232	55	0.676767	0.024075	0.127273	0.00169841	0.116422	0.490909	0.00849205	0.0745577	0.290909	0.00509523	0.648165	0.429255	0.04	0.15	0.0281049	0.0939671	0.380185
1612340	Honolulu, HI	21.3067	-157.867	0.3032	81	0.695014	0.0184012	0.0987654	0.0018031	0.195448	0.493827	0.00793365	0.0477356	0.246914	0.0052891	0.681851	0.469291	0.03	0.14	0.0138754	0.0662561	0.33746
1612480	Mokuoloe, HI	21.4331	-157.79	0.30584	90	0.700679	0.0152478	0.1	0.0013285	0.116935	0.422222	0.0076087	0.0286243	0.222222	0.00591787	0.668015	0.466979	0.04	0.15	0.0128866	0.0608706	0.357893
1615680	Kahului, HI	20.895	-156.477	0.30744	67	0.795339	0.0386249	0.208955	0.00240529	0.200319	0.61194	0.0113049	0.0855553	0.358209	0.00673482	0.748111	0.538045	0.04	0.16	0.00738474	0.0940585	0.468848
1617433	Kawaihae, HI	20.0366	-155.829	0.30584	86	0.604058	0.0670679	0.290698	0.00419741	0.294171	0.790698	0.016408	0.215428	0.744186	0.0114475	0.730311	0.581036	0.09	0.23	0.0162727	0.223277	0.443181
1617760	Hilo, HI	19.7303	-155.056	0.30924	131	0.72348	0.129771	0.473282	0.0182486	0.299269	0.778626	0.0255971	0.251381	0.694656	0.0172688	0.691681	0.499274	0.05	0.19	0.0588142	0.232089	0.453093
1619910	Midway Island	28.2117	-177.36	0.29524	175	0.308404	0.0187764	0.165714	0.0206326	0.0218886	0.285714	0.0285397	0.0712817	0.16	0.0234742	0.543847	0.16331	0.08	0.22	0.0145709	0.0500876	0.120051
1630000	Apra Harbor, Guam	13.4387	144.654	0.3086	112	0.391926	-0.00928463	0.00892857	0.00133387	0.124471	0.446429	0.00840336	0.0382856	0.366071	0.012405	0.892624	0.730874	0.07	0.17	-0.00389402	-0.00652507	0.0668262
1770000	Pago Pago, American Samoa	-14.28	-170.69	0.31392	49	0.406579	-0.00564636	0	0	0.448189	0.836735	0.00826141	0.142637	0.571429	0.00394575	0.924869	0.778364	0.08	0.22	-0.000146651	0.00394619	0.409348
1820000	Kwajalein, Marshall Islands	8.73161	167.736	0.32776	915	0.881104	0.534814	0.868852	0.0607337	0.709002	0.951913	0.0663043	0.614551	0.887432	0.0661685	0.885896	0.657168	0.07	0.19	0.488657	0.582371	0.683804
1890000	Wake Island	19.29	166.618	0.30872	179	0.601838	0.0111476	0.122905	0.0160608	0.0545067	0.24581	0.0229084	0.0323734	0.150838	0.0163098	0.409235	0.128232	0.05	0.17	-0.00377608	0.015309	0.298725
8413320	Bar Harbor, ME	44.3917	-68.205	0.63864	154	0.888813	0.264972	0.902597	0.0678325	0.25144	0.896104	0.0661402	0.247955	0.902597	0.0637428	0.486213	0.35138	0.05	0.21	0.207755	0.284998	0.568293
8418150	Portland, ME	43.6567	-70.2467	0.620762	144	0.806238	0.148166	0.770833	0.0568761	0.166539	0.777778	0.0566335	0.158405	0.763889	0.0559059	0.555098	0.411903	0.05	0.2	0.122249	0.201669	0.46566
8443970	Boston, MA	42.3548	-71.0534	0.625224	198	0.815681	0.204197	0.752525	0.0720754	0.210065	0.752525	0.0710964	0.2071	0.752525	0.0702398	0.404268	0.26891	0.09	0.26	0.0819111	0.276648	0.536483
8447930	Woods Hole, MA	41.5233	-70.6717	0.526894	66	0.504887	-0.000351609	0	0.00428449	0.0109458	0.0151515	0.00489656	-0.00532054	0	0.00465173	0.415828	0.303702	0.08	0.25	-0.00271951	0.00235828	0.160613
8449130	Nantucket Island, MA	41.285	-70.0967	0.543564	62	0.383414	-0.00271412	0	0.00072692	0.00928655	0	0.00121153	0.0024611	0	0.000969227	0.337406	0.255472	0.09	0.27	-0.00239031	0.00177676	0.149013
8452660	Newport, RI	41.505	-71.3267	0.546956	73	0.664841	0.0315823	0.246575	0.0166045	0.0506716	0.273973	0.018289	0.0358946	0.232877	0.0176874	0.429751	0.304161	0.08	0.25	0.00882089	0.0463243	0.354856
8454000	Providence, RI	41.8071	-71.4012	0.559035	110	0.780622	0.0752421	0.5	0.0413835	0.100574	0.481818	0.0430825	0.0839204	0.454545	0.0418689	0.485222	0.337517	0.08	0.24	0.0414001	0.101163	0.414685
8461490	New London, CT	41.3614	-72.09	0.537196	75	0.350037	-0.00396715	0	0.000120875	0.00609608	0	0.000483501	-0.00101269	0	0.000725251	0.378926	0.27567	0.09	0.26	-0.00416357	-0.0036217	0.0712108
8467150	Bridgeport, CT	41.1733	-73.1817	0.58924	112	0.499764	0.0427484	0.357143	0.0405684	0.0428957	0.366071	0.0408114	0.0356915	0.357143	0.0412972	0.375799	0.298906	0.07	0.23	0.0148659	0.0531951	0.236929
8510560	Montauk, NY	41.0483	-71.96	0.5308	80	0.44648	-0.0067382	0	0.00278411	0.0120457	0	0.00240445	-0.000601392	0	0.00278411	0.294614	0.24364	0.1	0.28	-0.00629311	-0.00857589	0.143261
8516945	Kings Point, NY	40.8103	-73.7649	0.59512	151	0.541411	-0.0015961	0.490066	0.0996831	-0.00169074	0.490066	0.101928	-0.00423123	0.496689	0.0999472	0.3231	0.285256	0.06	0.23	-0.00870723	0.00154089	0.187635
8518750	The Battery, NY	40.7006	-74.0142	0.56164	148	0.443026	0.0358667	0.263514	0.0345443	0.0325962	0.277027	0.0353091	0.0150852	0.297297	0.0355641	0.413393	0.305643	0.09	0.26	0.0182095	0.0610763	0.312976
8519483	Bergen Point, NY	40.6367	-74.1417	0.5672	139	0.532896	0.0363424	0.323741	0.0457873	0.0422954	0.302158	0.04678	0.0361658	0.316547	0.0464077	0.38178	0.307767	0.09	0.27	0.020633	0.0561302	0.294266
8531680	Sandy Hook, NJ	40.4669	-74.0094	0.563698	170	0.486501	0.0532141	0.364706	0.0479569	0.0632632	0.358824	0.0482016	0.0680463	0.352941	0.0480793	0.338286	0.277102	0.11	0.31	0.0190277	0.0891421	0.412105
8534720	Atlantic City, NJ	39.355	-74.4183	0.556121	163	0.463853	0.0307006	0.245399	0.0371989	0.0274878	0.239264	0.0375733	0.0207979	0.245399	0.0386968	0.320379	0.302739	0.1	0.29	0.0142103	0.0636868	0.317455
8536110	Cape May, NJ	38.9683	-74.96	0.5664	105	0.528288	0.0202783	0.219048	0.0368286	0.0192755	0.238095	0.0370733	0.0178272	0.247619	0.0381745	0.294751	0.254192	0.11	0.3	0.0104499	0.0404362	0.292875
8545240	Philadelphia, PA	39.9333	-75.1417	0.58156	88	0.557261	-0.00442343	0	0	-0.00840494	0.0113636	0.0019333	-0.0182312	0	0.000120831	0.460015	0.319473	0.1	0.27	-0.00378184	-0.000626523	0.0409907
8551910	Reedy Point, DE	39.5583	-75.5733	0.5712	32	0.352799	0.00793137	0.03125	0.00206561	0.00660919	0.0625	0.00255164	-0.000571817	0.0625	0.00230863	0.359168	0.283566	0.09	0.27	-0.00237391	0.00884254	0.115798
8557380	Lewes, DE	38.7817	-75.12	0.55673	139	0.405948	0.0135074	0.172662	0.0325243	0.00874195	0.172662	0.0350728	0.00416561	0.172662	0.0338592	0.308213	0.278746	0.1	0.28	0.00974395	0.0256866	0.22946
8571892	Cambridge, MD	38.5733	-76.0683	0.524876	66	0.253389	-0.000251004	0	0	-0.00165865	0	0.000612145	-0.00896091	0	0.000122429	0.407196	0.301374	0.1	0.28	-0.00239907	0.00167815	0.0490753
8573364	Tolchester Beach, MD	39.2133	-76.245	0.52108	99	0.35294	-0.00308463	0	0	0.0121491	0.010101	0.00184479	0.00695243	0.010101	0	0.473206	0.346469	0.09	0.27	-0.00335087	0.0026099	0.0360758
8574680	Baltimore, MD	39.2667	-76.5783	0.520244	90	0.249308	-0.00143055	0	0	-0.00349192	0	0.00228778	-0.0109405	0	0.000120409	0.395833	0.265449	0.09	0.27	-0.00104303	0.00692907	0.0520211
8575512	Annapolis, MD	38.9833	-76.4816	0.51752	94	0.249546	0.00176176	0	0.000122205	-0.00473539	0.0212766	0.00366614	-0.0214759	0	0.000611023	0.460785	0.306926	0.1	0.28	-0.0013748	0.00779822	0.0407344
8577330	Solomons Island, MD	38.3167	-76.4517	0.517974	74	0.231846	0.00228659	0	0.000123931	0.00782211	0	0.00185897	0.00413987	0	0.000619655	0.43048	0.313331	0.12	0.31	-0.00143136	0.00408195	0.0475097
8594900	Washington, DC	38.8733	-77.0217	0.538604	109	0.187585	0.00922742	0.0917431	0.00747214	0.0025648	0.155963	0.0208967	-0.00397443	0.12844	0.012538	0.479626	0.337955	0.1	0.28	0.000592158	0.0188839	0.0820896
8631044	Wachapreague, VA	37.6078	-75.6858	0.555	126	0.383195	0.0151808	0.15873	0.0251966	-0.00411474	0.18254	0.0301486	-0.0336649	0.15873	0.0278182	0.443192	0.342241	0.11	0.3	0.0101234	0.018589	0.149493
8632200	Kiptopeke, VA	37.1652	-75.9884	0.535821	98	0.278564	0.0040452	0.102041	0.0143859	0.000157	0.102041	0.0152321	-0.00600557	0.132653	0.0146277	0.35147	0.263144	0.09	0.27	0.00791701	0.017935	0.114496
8635750	Lewisetta, VA	37.9961	-76.4644	0.518336	120	0.214089	0.00692448	0.0333333	0.00486914	0.00111067	0.0833333	0.00961656	-0.0067033	0.0583333	0.00608643	0.439928	0.32754	0.13	0.32	0.000440864	0.0143778	0.059473
8636580	Windmill Point, VA	37.6162	-76.29	0.52	118	0.275374	0.00215614	0	0.00494621	-0.00586801	0.0169492	0.00704835	-0.0196373	0.0338983	0.00482255	0.393383	0.309468	0.15	0.34	0.00130898	0.0172923	0.0657268
8638610	Sewells Point, VA	36.9467	-76.33	0.5336	175	0.237765	0.0166628	0.234286	0.0425532	0.0108584	0.24	0.0448632	0.0070066	0.251429	0.0443769	0.356194	0.261736	0.12	0.32	0.0066896	0.0347256	0.121394
8651370	Duck, NC	36.1833	-75.7467	0.544951	149	0.393686	0.0339829	0.328859	0.0417379	0.0277159	0.33557	0.042104	0.0301034	0.33557	0.0411277	0.273488	0.210653	0.1	0.29	0.0218854	0.056194	0.228481
8652587	Oregon Inlet Marina, NC	35.795	-75.5483	0.5144	53	0.303769	-0.00578454	0	0	-0.00903405	0	0	-0.0163971	0	0	0.48929	0.314424	0.12	0.31	-0.00376264	-0.0082242	0.0387246
8656483	Beaufort, NC	34.72	-76.67	0.543148	30	0.541804	0.010613	0.1	0.0041816	0.00431759	0.133333	0.0041816	-0.00408646	0.0666667	0.00406213	0.374374	0.221394	0.09	0.26	0.0020749	0.019932	0.178491
8658120	Wilmington, NC	34.2267	-77.9533	0.55708	37	0.421742	0.00416263	0.027027	0.00108434	-0.00835165	0.027027	0.00445783	-0.00549286	0.0540541	0.000963855	0.538078	0.249767	0.08	0.23	0.00184458	0.0108705	0.0734356
8661070	Springmaid Pier, SC	33.655	-78.9183	0.56828	68	0.629615	0.076065	0.470588	0.0233783	0.0973277	0.441176	0.0250482	0.081289	0.455882	0.0238921	0.450471	0.189217	0.05	0.21	0.0445695	0.0594713	0.261191
8665530	Charleston, SC	32.7817	-79.925	0.570294	64	0.554187	0.0693765	0.375	0.0223129	0.0846779	0.4375	0.0239923	0.0592696	0.40625	0.0231526	0.452099	0.155436	0.09	0.26	0.0135184	0.0762419	0.323277
8670870	Fort Pulaski, GA	32.0333	-80.9017	0.591493	79	0.682262	0.0842472	0.620253	0.0429744	0.085251	0.64557	0.0470787	0.0738206	0.620253	0.043578	0.43982	0.100143	0.09	0.26	-0.0239623	0.0807634	0.389321
8720030	Fernandina Beach, FL	30.6717	-81.465	0.57996	61	0.659066	0.0350337	0.47541	0.0318954	0.036618	0.491803	0.0331174	0.0275352	0.47541	0.0315288	0.401691	0.029582	0.06	0.21	-0.061928	0.0147412	0.19975
8720218	Mayport, FL	30.3967	-81.43	0.56032	25	0.779553	0.00124651	0.36	0.0217925	-0.0135787	0.4	0.0226584	-0.0183202	0.36	0.022947	0.467088	0.0681253	0.09	0.24	-0.0786511	-0.0532156	0.168808
8721604	Port Canaveral, FL	28.4158	-80.5931	0.54772	63	0.607159	0.0870151	0.380952	0.0196741	0.0679487	0.380952	0.0199155	0.0721425	0.380952	0.0197948	0.462685	0.0881991	0.11	0.25	-0.0324988	0.0952917	0.266693
8723214	Virginia Key, FL	25.7314	-80.1618	0.52668	22	0.462447	0.0252004	0.0454545	0.00024001	0.0453802	0.181818	0.000960038	0.0159952	0.0909091	0.000480019	0.482025	0.239417	0.07	0.21	-0.00138047	0.0135354	0.185828
8723970	Vaca Key, FL	24.7117	-81.105	0.51188	3	0.57677	NaN	NaN	NaN	NaN	NaN	NaN	NaN	NaN	NaN	0.454565	0.218216	0.09	0.24	NaN	NaN	0.0565999
8724580	Key West, FL	24.5557	-81.8079	0.522053	2	0.538493	NaN	NaN	NaN	NaN	NaN	NaN	NaN	NaN	NaN	0.514756	0.220651	0.07	0.21	NaN	NaN	0.0265433
8725110	Naples, FL	26.1317	-81.8075	0.53496	16	0.564315	-0.00186107	0	0	0.0515307	0	0	-0.0207564	0	0	0.502001	0.243871	0.08	0.22	-0.00117528	-0.00238804	0.0742647
8725520	Fort Myers, FL	26.6477	-81.8712	0.51604	35	0.293891	-0.00339998	0	0	-0.0129181	0	0	-0.0333756	0	0	0.541626	0.245416	0.07	0.21	-0.00284438	-0.00344748	0.0383826
8726520	St. Petersburg, FL	27.7606	-82.6269	0.527537	33	0.418629	-0.00323665	0	0	-0.00580265	0	0	-0.0139461	0	0	0.475009	0.226763	0.07	0.23	-0.00292464	-0.003035	0.0612789
8726724	Clearwater, FL	27.978	-82.832	0.53364	35	0.493564	-0.00395436	0	0	-0.00694534	0	0	-0.0150243	0	0	0.535751	0.296903	0.09	0.25	-0.00280899	-0.00178865	0.121867
8727520	Cedar Key, FL	29.135	-83.0317	0.54632	60	0.363251	0.0104384	0.05	0.00396089	-0.00068564	0.0666667	0.00792177	-0.00532483	0.05	0.006684	0.511961	0.35778	0.08	0.22	-0.00300088	-0.00188663	0.105601
8728690	Apalachicola, FL	29.7267	-84.9817	0.519681	57	0.341813	-0.00576572	0	0	-0.0130425	0	0	-0.0203764	0	0	0.514372	0.254796	0.07	0.21	-0.00437148	-0.00601365	0.00179187
8729108	Panama City, FL	30.1523	-85.6669	0.51636	36	0.502336	-0.00410982	0	0	-0.0177221	0	0	-0.0319497	0	0	0.523809	0.29102	0.07	0.21	-0.00315566	-0.00559219	0.026911
8729210	Panama City Beach, FL	30.2133	-85.8783	0.52	39	0.477091	-0.00561075	0	0	-0.0153157	0	0.000161421	-0.036728	0	0	0.514602	0.343438	0.09	0.23	-0.00434582	-0.00217697	0.0451842
8729840	Pensacola, FL	30.4044	-87.2112	0.515312	50	0.471909	-0.00343525	0	0	-0.0158269	0	0.000621504	-0.033148	0	0	0.553023	0.267719	0.08	0.22	-0.00442561	-0.00388898	0.0441696
8735180	Dauphin Island, AL	30.25	-88.075	0.51468	53	0.413112	2.15605e-05	0	0.0007494	-0.0221877	0.0188679	0.00644484	-0.0486726	0.0377358	0.0029976	0.641158	0.430381	0.09	0.25	-0.00358637	0.00505894	0.0882229
8747437	Bay Waveland, MS	30.3264	-89.3258	0.52116	95	0.444069	-0.00192767	0.0421053	0.0158699	-0.0171887	0.0736842	0.0243999	-0.0262603	0.0736842	0.0204325	0.534092	0.377994	0.1	0.29	-0.00558509	0.00400949	0.0947817
8761724	Grand Isle, LA	29.2633	-89.9567	0.51292	24	0.466157	-0.0027913	0	0	-0.00854016	0	0	-0.0176807	0	0	0.469314	0.191251	0.16	0.43	-0.00191969	-0.00295313	0.0998986
8770570	Sabine Pass, TX	29.7284	-93.8701	0.51952	90	0.281567	0.0198494	0.133333	0.00914077	0.0379965	0.388889	0.0286411	0.016897	0.166667	0.0153565	0.56702	0.268385	0.12	0.33	-0.000872847	0.00834986	0.0288758
8770613	Morgans Point, TX	29.6817	-94.985	0.52	141	0.317089	0.000176983	0.0070922	0.00109622	0.00201534	0.0567376	0.00791717	-0.00786125	0.0141844	0.00207065	0.394266	0.106838	0.08	0.28	-0.00482034	0.000303612	0.0763763
8771013	Eagle Point, TX	29.48	-94.9183	0.51	273	0.462579	0.0858673	0.487179	0.0964674	0.0792742	0.527473	0.104867	0.0784982	0.494505	0.0983202	0.391657	0.0822845	0.28	0.53	-0.00384229	0.0682359	0.16579
8771450	Galveston Pier 21, TX	29.31	-94.7933	0.51716	114	0.306878	0.0202384	0.210526	0.0231716	0.012366	0.263158	0.042602	0.00910509	0.210526	0.0298093	0.522008	0.275893	0.14	0.36	-0.00209949	0.0153801	0.0840659
8774770	Rockport, TX	28.0217	-97.0467	0.50444	37	0.390755	0.0170921	0	0	0.0131208	0.0810811	0.00248416	-0.00671452	0.0810811	0.000496833	0.474106	0.196879	0.18	0.39	-0.00101516	0.0131509	0.155905
8775870	Corpus Cristi, TX	27.58	-97.2167	0.51988	74	0.466434	0.0121747	0.108108	0.00818488	0.0124345	0.175676	0.0125181	0.00327931	0.108108	0.00974964	0.456249	0.161205	0.1	0.29	-0.000927805	0.0212621	0.204169
8779770	Port Isabel, TX	26.06	-97.215	0.516732	36	0.522492	0.0187802	0.0833333	0.00143781	0.0107468	0.111111	0.00371435	0.00849118	0.0833333	0.00143781	0.435201	0.0894291	0.12	0.29	0.000479616	0.0182015	0.205687
9410170	San Diego, CA	32.7142	-117.174	0.569792	74	0.906929	0.283333	0.716216	0.0142994	0.482985	0.864865	0.013218	0.371135	0.797297	0.0144196	0.804744	0.633875	0.05	0.15	0.34613	0.408382	0.61638
9410230	La Jolla, CA	32.8667	-117.258	0.56497	49	0.876597	0.22289	0.673469	0.0079346	0.30595	0.816327	0.00877615	0.211025	0.612245	0.00853571	0.770481	0.566075	0.03	0.14	0.221646	0.321318	0.544202
9410660	Los Angeles, CA	33.72	-118.272	0.566952	37	0.888754	0.225366	0.567568	0.00657659	0.329284	0.837838	0.00765276	0.234223	0.621622	0.00681574	0.764831	0.561843	0.03	0.11	0.250506	0.361327	0.505808
9410840	Santa Monica, CA	34.0083	-118.5	0.56612	45	0.916604	0.219746	0.622222	0.00885707	0.332123	0.8	0.0100704	0.232752	0.711111	0.00885707	0.77844	0.580648	0.03	0.11	0.304744	0.377803	0.543165
9412110	Port San Luis, CA	35.1767	-120.76	0.56492	16	0.87505	0.169017	0.625	0.00203301	0.181107	0.625	0.00334848	0.145031	0.5625	0.0021526	0.749315	0.562635	0.02	0.09	0.214397	0.265046	0.385291
9413450	Monterey, CA	36.605	-121.888	0.56504	17	0.860646	0.131373	0.588235	0.00226649	0.141075	0.529412	0.00310151	0.114705	0.529412	0.00250507	0.728922	0.538509	0.02	0.11	0.142506	0.229304	0.349371
9414290	San Francisco, CA	37.8067	-122.465	0.571211	14	0.755933	0.00986616	0	0	0.0054097	0	0	-0.00305855	0	0	0.681447	0.482705	0.03	0.13	0.0153717	0.0326474	0.110929
9414750	Alameda, CA	37.7717	-122.298	0.58041	12	0.737935	0.00884256	0	0	0.0114749	0	0	-0.0022586	0	0	0.704361	0.506444	0.01	0.08	0.012707	0.0169096	0.086296
9415020	Point Reyes, CA	37.9961	-122.977	0.57032	34	0.776979	0.085388	0.411765	0.00564768	0.111007	0.382353	0.00672915	0.0771675	0.382353	0.00576784	0.635074	0.448379	0.04	0.14	0.0964059	0.136001	0.295901
9415144	Port Chicago, CA	38.056	-122.04	0.559914	19	0.679513	0.000997319	0	0	-0.000392396	0	0.000240529	-0.0174511	0	0.000120265	0.636551	0.388066	0.03	0.13	0.001387	0.00445523	0.0277461
9416841	Arena Cove, CA	38.9133	-123.708	0.57148	56	0.751991	0.0762964	0.375	0.0142617	0.0945075	0.392857	0.0142617	0.0819391	0.392857	0.0147411	0.568035	0.42631	0.02	0.1	0.0985044	0.120286	0.230704
9418767	Humboldt Bay, CA	40.7667	-124.217	0.5836	120	0.810472	0.225809	0.691667	0.0244908	0.237261	0.758333	0.0267944	0.238646	0.716667	0.0261882	0.513968	0.394409	0.1	0.24	0.234763	0.30327	0.477092
9431647	Port Orford, CA	42.739	-124.498	0.58884	109	0.713754	0.161091	0.651376	0.0307397	0.189271	0.678899	0.0345821	0.154573	0.688073	0.0314258	0.398755	0.253796	0.01	0.08	0.161557	0.180773	0.216328
9432780	Charleston, OR	43.345	-124.322	0.59292	146	0.753756	0.177729	0.657534	0.0345413	0.195523	0.691781	0.0364804	0.185101	0.69863	0.0344201	0.406421	0.29568	0.02	0.09	0.198246	0.204964	0.242145
9435380	South Beach, OR	44.625	-124.043	0.60172	178	0.796918	0.21304	0.735955	0.0464607	0.220428	0.747191	0.0502311	0.223364	0.769663	0.0464607	0.388542	0.280949	0.04	0.13	0.244021	0.267578	0.325736
9440910	Toke Point,WA	46.7075	-123.967	0.608779	289	0.693406	0.210065	0.778547	0.0995981	0.209232	0.754325	0.0958302	0.211587	0.775087	0.0970862	0.333159	0.212155	0	0.05	0.236741	0.236741	0.272194
9444090	Port Angeles, WA	48.125	-123.44	0.586121	84	0.620031	0.121571	0.571429	0.0375361	0.129309	0.607143	0.0398219	0.134215	0.559524	0.0369346	0.381228	0.27802	0	0.05	0.125232	0.125232	0.143254
9444900	Port Townsend, WA	48.1117	-122.758	0.603859	68	0.585749	0.026188	0.25	0.0268843	0.0622054	0.308824	0.0292847	0.0482163	0.308824	0.0267643	0.369739	0.264251	0.03	0.1	0.0315043	0.0324137	0.0449904
9447130	Seattle, WA	47.6026	-122.339	0.638488	63	0.87545	0.0183166	0.349206	0.0268682	0.0469359	0.428571	0.027228	0.0337221	0.412698	0.0266283	0.407142	0.304701	0.04	0.13	0.0253636	0.0292458	0.0569523
9449424	Cherry Point, WA	48.8633	-122.758	0.61152	76	0.714683	0.0240281	0.315789	0.0329897	0.0343531	0.368421	0.0343238	0.0248105	0.342105	0.0320194	0.383863	0.304743	0	0.04	0.026108	0.026108	0.0379565
9449880	Friday Harbor, WA	48.5467	-123.01	0.594546	83	0.615027	0.0288286	0.277108	0.0315017	0.0472845	0.301205	0.0328243	0.0314869	0.313253	0.0310208	0.383694	0.299517	0.02	0.09	0.0319096	0.0454866	0.0632787
9751401	Lime Tree Bay, VI	17.6947	-64.7538	0.50864	2	0.597816	NaN	NaN	NaN	NaN	NaN	NaN	NaN	NaN	NaN	0.65179	0.393256	0.06	0.17	NaN	NaN	NaN
9751639	Charlotte Amalie, VI	18.3358	-64.92	0.5096	0	0.566847	NaN	NaN	NaN	NaN	NaN	NaN	NaN	NaN	NaN	0.764391	0.482065	0.04	0.15	NaN	NaN	NaN
9755371	San Juan, PR	18.4589	-66.1164	0.5192	1	0.677426	NaN	NaN	NaN	NaN	NaN	NaN	NaN	NaN	NaN	0.71311	0.442309	0.05	0.17	NaN	NaN	NaN
9759110	Magueyes Island, PR	17.9701	-67.0464	0.508149	1	0.557908	NaN	NaN	NaN	NaN	NaN	NaN	NaN	NaN	NaN	0.725784	0.482528	0.05	0.16	NaN	NaN	NaN
